# Supplementary material for: Chemical-Genetic Interactions of Bacopa monnieri Constituents in Cells Deficient for the DNA Repair Endonuclease RAD1 Appear Linked to Vacuolar Disruption
Source: MDPI journal article supplement (doi:10.3390/molecules26051207), 2021-02-24
Supplement: s1 [file s1]

# **Chemical-Genetic Interactions of *Bacopa monnieri* Constituents in Cells Deficient for the DNA Repair Endonuclease *RAD1* Appear Linked to Vacuolar Disruption**

Chananya Huangteerakul <sup>1</sup>, Hsu Mon Aung <sup>1</sup>, Thitipa Thosapornvichai <sup>1</sup>, Marisa Duangkaew <sup>2</sup>, Amornrat Naranuntarat Jensen <sup>3,4</sup>, Suchada Sukrong <sup>5</sup>, Kornkanok Ingkaninan <sup>6</sup> and Laran T. Jensen <sup>1,\*</sup>

<sup>1</sup> Department of Biochemistry, Faculty of Science, Mahidol University, Bangkok 10400, Thailand;  
c.huangteerakul@gmail.com (C.H.); drhsumonaung87@gmail.com (H.M.A.);  
pa\_lim\_piim@hotmail.com (T.T.)

<sup>2</sup> Toxicology Graduate Program, Faculty of Science, Mahidol University, Bangkok 10400, Thailand;  
who-miss@hotmail.com

<sup>3</sup> Department of Pathobiology, Faculty of Science, Mahidol University, Bangkok 10400, Thailand;  
amornrat.nar@mahidol.edu

<sup>4</sup> Center of Excellence on Environmental Health and Toxicology (EHT), Bangkok 10400, Thailand

<sup>5</sup> Research Unit of DNA Barcoding of Thai Medicinal Plants, Department of Pharmacognosy and Pharmaceutical Botany, Faculty of Pharmaceutical Sciences, Chulalongkorn University, Bangkok 10400, Thailand;  
suchada.su@chula.ac.th

<sup>6</sup> Department of Pharmaceutical Chemistry and Pharmacognosy, Faculty of Pharmaceutical Sciences and Center of Excellence for Innovation in Chemistry, Naresuan University, Phitsanulok 65000, Thailand; k\_ingkaninan@yahoo.com

\* Correspondence: laran.jen@mahidol.edu; Tel.: +66-2-201-5460

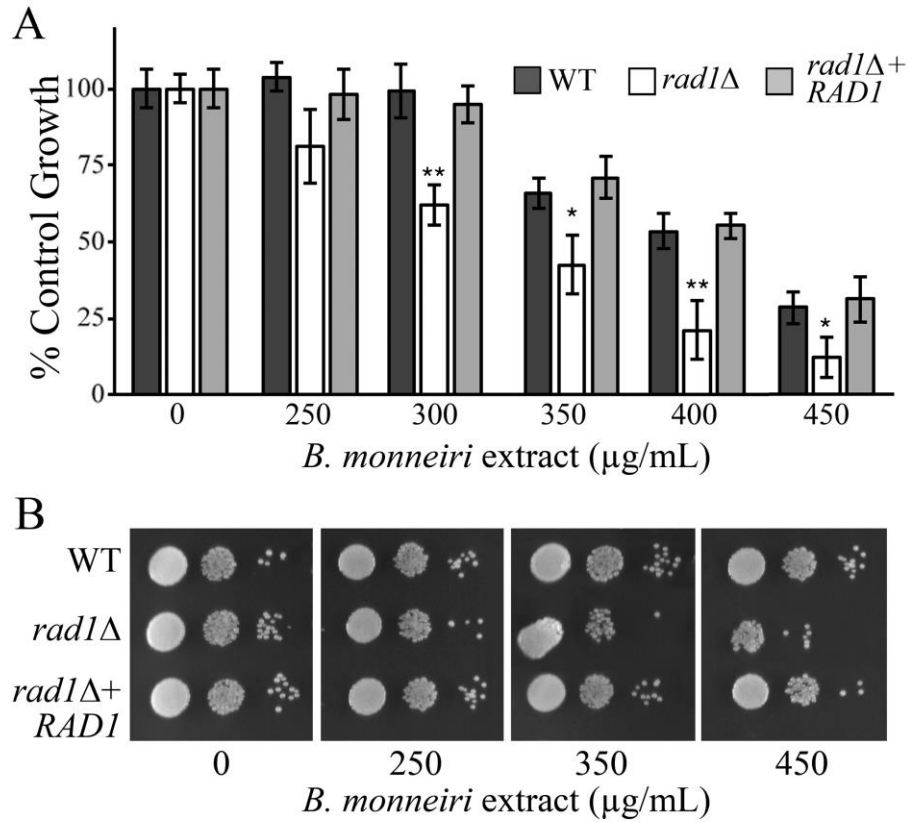

**Figure S1:** Sensitivity of *rad1*Δ yeast toward *B. monneiri* extracts is rescued by episomal expression of *RAD1*. (**A,B**) Yeast strains WT and *rad1*Δ (12806) transformed with the control plasmid (pRS315) and *rad1*Δ transformed with pLJ540 (*RAD1*) were grown in synthetic medium lacking leucine with 2% glucose in the presence of 2% DMSO and 0.2% Tween 80 (vehicle control) or *B. monneiri* extracts at the concentrations listed. Values are mean  $\pm$  SD ( $n=3$ ). Growth was monitored by measuring OD at 600 nm with vehicle control (0) set at 100%. Statistical analysis employed Student's t-test with \*\*  $p < 0.01$ , \*  $p < 0.05$ . (**B**) Serial dilutions of liquid cultures from A were spotted onto solid synthetic medium lacking leucine with 2% glucose as described in Figure 3. Samples were incubated for 3 days and photographed.
